# Supplementary material for: A selective nanosensor for ultrafast detection of Cu2+ions based on C5 DNA-templated gold nanoclusters and Fenton-like reaction
Source: Royal Society of Chemistry journal article supplement (doi:10.1039/c7ay02247f), 2017-01-01
Supplement: c7ay02247f1.pdf [file c7ay02247f1.pdf]

## Supporting information

### **A selective nanosensor for ultrafast detection of Cu<sup>2+</sup> ions based on C5 DNA-templated gold nanoclusters and Fenton-like reaction**

*Taiping Qing, Hongchang Bu, Xiaoxiao He,\* Dinggeng He, Bing Zhou,\* Huanhuan Sun, Ruichen Jia, Wenjie Ma, Kemin Wang\**

State Key Laboratory of Chemo/Biosensing and Chemometrics, College of Biology, College of Chemistry and Chemical Engineering, Hunan University, Key Laboratory for Bio-Nanotechnology and Molecular Engineering of Hunan Province, Changsha 410082, China.

\*To whom correspondence should be addressed. Tel: 86-731-88821566; Fax: 86-731-88821566; E-mail: kmwang@hnu.edu.cn; xiaoxiaohe@hnu.edu.cn; zhoubing@hnu.edu.cn

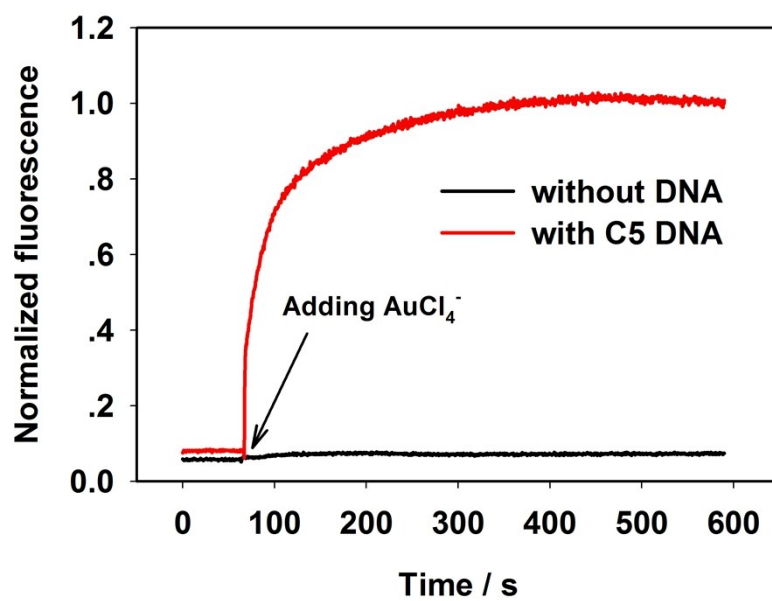

**Figure S1** Real-time recordings of the fluorescence emission intensity changes of reaction solutions as a function of time in the absence (black line) or presence (red line) of C5 DNA. The arrow marks the addition of AuCl<sub>4</sub><sup>-</sup> to the buffered solutions.

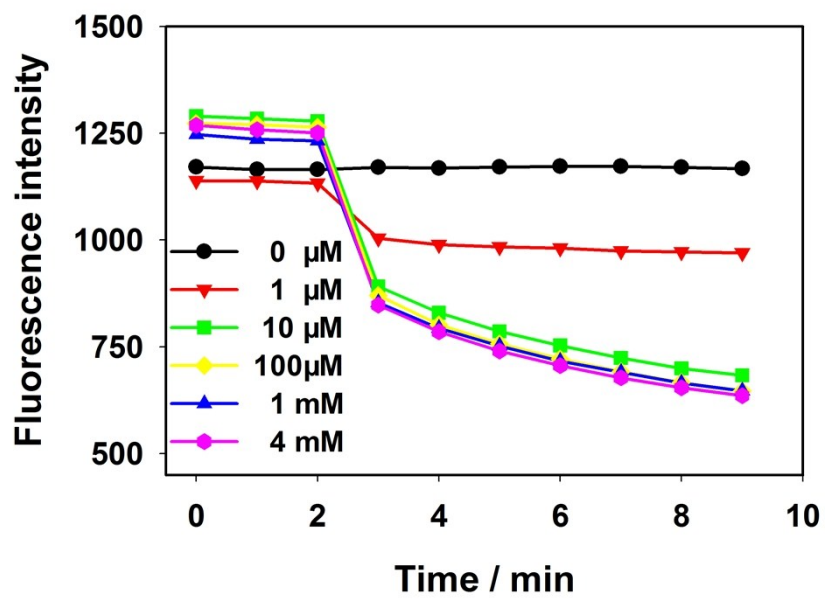

**Figure S2** Impact of Vc on the fluorescence of the C5-AuNCs with 10  $\mu\text{M}$   $\text{Cu}^{2+}$  ions.

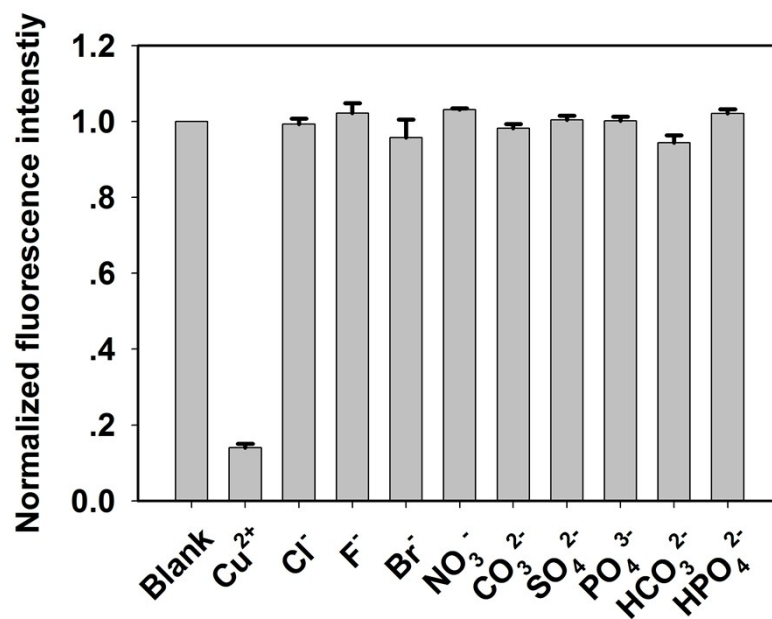

**Figure S3** Impact of anions (100  $\mu\text{M}$ ) on the fluorescence of this nanosensor.

**Table S1.** Comparison of sensing performance of different fluorescent probes for Cu<sup>2+</sup> ions detection

| Probes                              | Linear range                          | LOD         | References                                                   |
|-------------------------------------|---------------------------------------|-------------|--------------------------------------------------------------|
| PMAA-AgNCs                          | 10 nM – 30 $\mu$ M                    | 10 nM       | <i>Nanoscale</i> , 2013, <b>5</b> , 10022-10028.             |
| DNA-AgNCs                           | 15 – 200 nM                           | 8 nM        | <i>Chem. Commun.</i> , 2010, <b>46</b> , 1257-1259.          |
| DNA-AgNCs                           | 0 – 1 $\mu$ M                         | 10 nM       | <i>Analyst</i> , 2011, <b>136</b> , 5139-5142.               |
| G-enhanced DNA-AgNCs                | 6 – 240 nM                            | 3.4 nM      | <i>Spectrochim. Acta A</i> , 2015, <b>137</b> , 1250-1257.   |
| CdS QDs                             | /                                     | 100 nM      | <i>Anal. Chem.</i> , 2002, <b>74</b> , 5132-5138             |
| DNA-CuNPs                           | /                                     | 5.6 $\mu$ M | <i>Biosens. Bioelectron.</i> , 2016, <b>78</b> , 471-476.    |
| DNA-Cu/AgNCs                        | 5 – 200 nM                            | 2.7 nM      | <i>Anal. Chem.</i> , 2010, <b>82</b> , 8566–8572             |
| c-mpg-C <sub>3</sub> N <sub>4</sub> | 10 – 100 nM                           | 12.336 nM   | <i>Angew. Chem., Int. Ed.</i> , 2010, <b>49</b> , 9706-9710. |
| DNAzyme                             | 0 – 20 $\mu$ M                        | 35 nM       | <i>J. Am. Chem. Soc.</i> , 2007, <b>129</b> , 9838-9839.     |
| 11-MUA-AuNPs                        | 10 <sup>-8</sup> – 10 <sup>-6</sup> M | 87 nM       | <i>Analyst</i> , 2012, <b>137</b> , 301-304.                 |
| DNA-AuNCs                           | 0.01 – 10 $\mu$ M                     | 10 nM       | This work                                                    |
